# Supplementary material
Source: Springer Nature journal article supplement (https://www.springermedizin.de/resource/supplementary/12874_2012_893_MOESM5_ESM.pdf/9433024)

Figure 2C: Incremental cost-effectiveness plane with results for 75-year-old patients

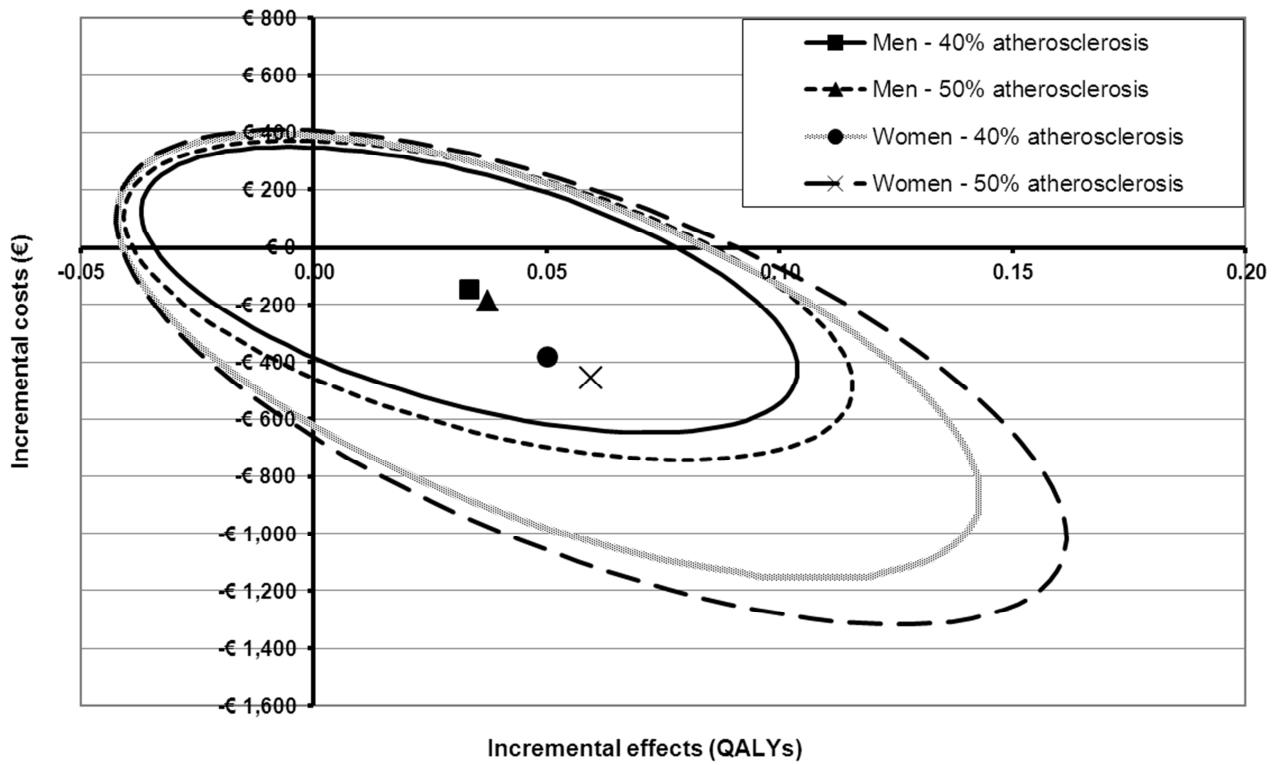

Supplement: MOESM5 [file 9433024]
